# Supplementary figures and images for: RETRACTED ARTICLE: Curcumin synergizes with 5-fluorouracil by impairing AMPK/ULK1-dependent autophagy, AKT activity and enhancing apoptosis in colon cancer cells with tumor growth inhibition in xenograft mice
Source: Springer Nature journal article supplement (doi:10.1186/s13046-017-0661-7), 2017-12-01

**A**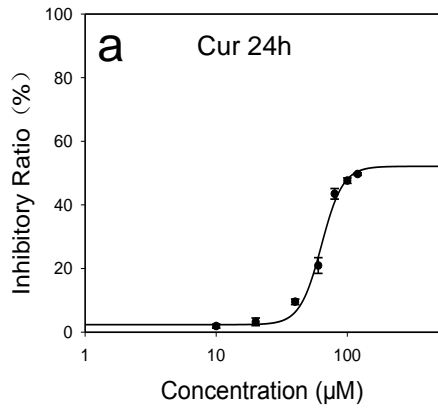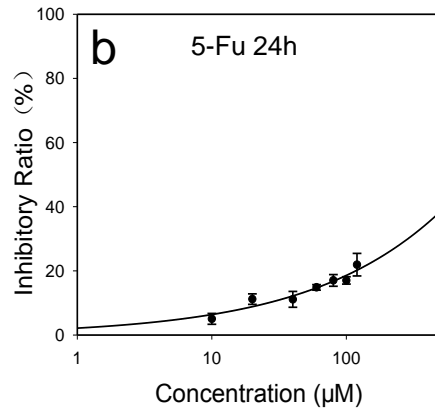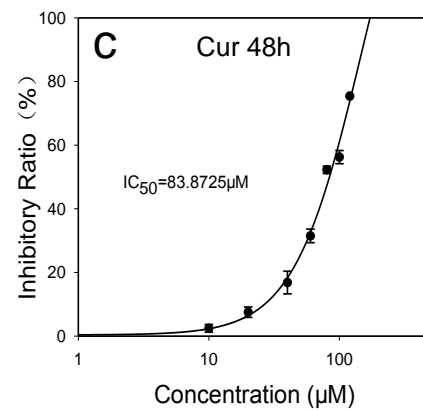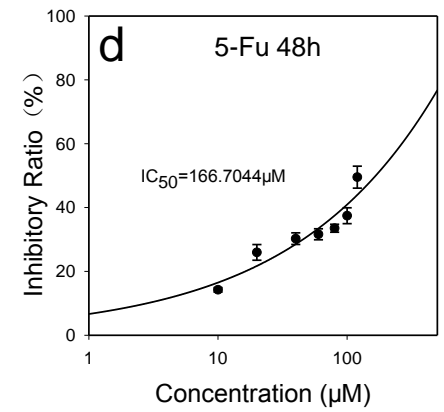**B**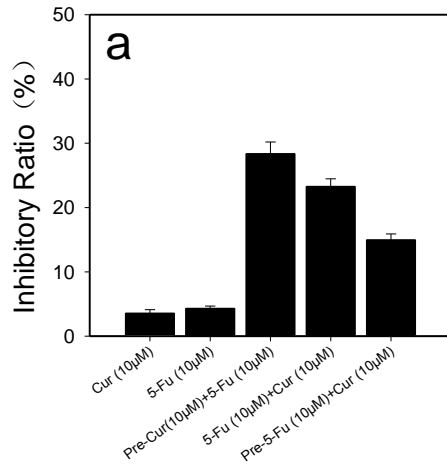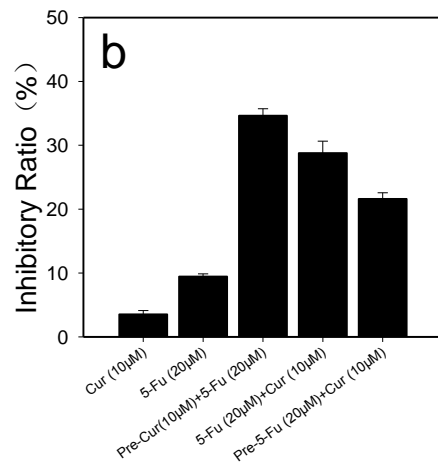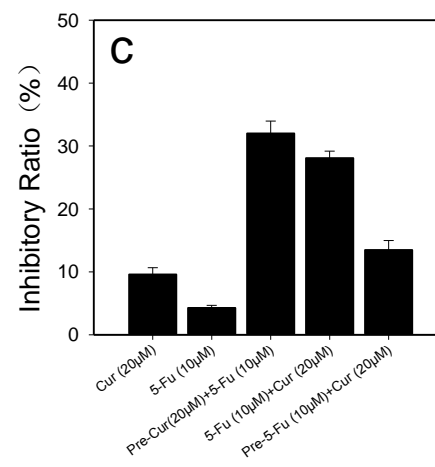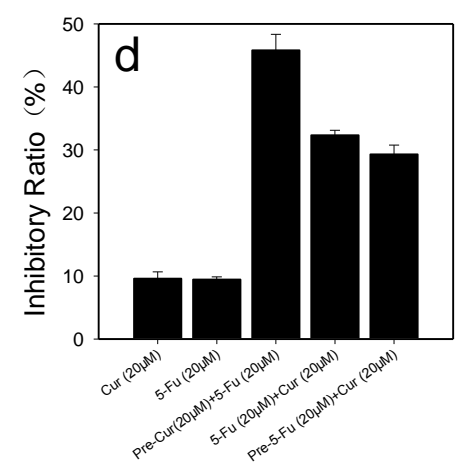

Supplement: 13046_2017_661_MOESM1_ESM.pdf [file 13046_2017_661_MOESM1_ESM.pdf]

**A****HCT116**5-Fu ( $\mu\text{M}$ )

10

20

40

80

24h

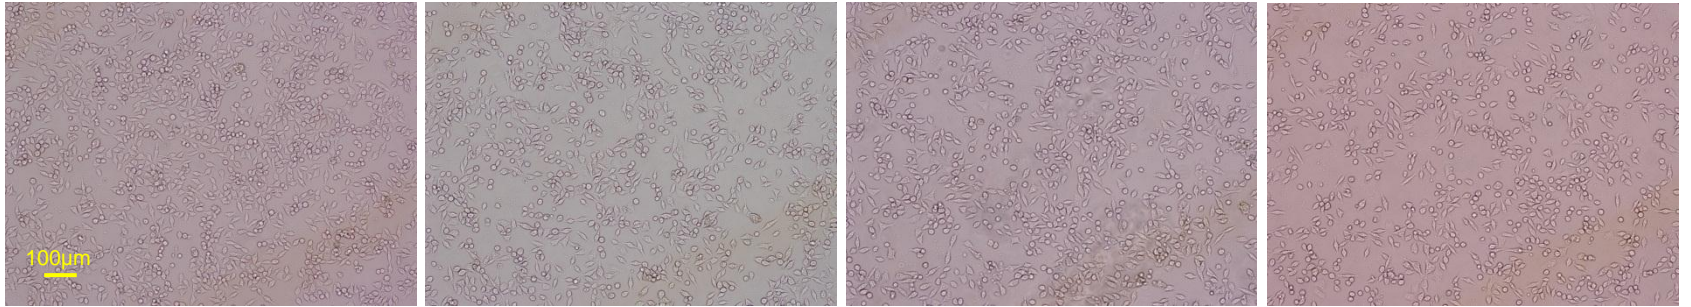

48h

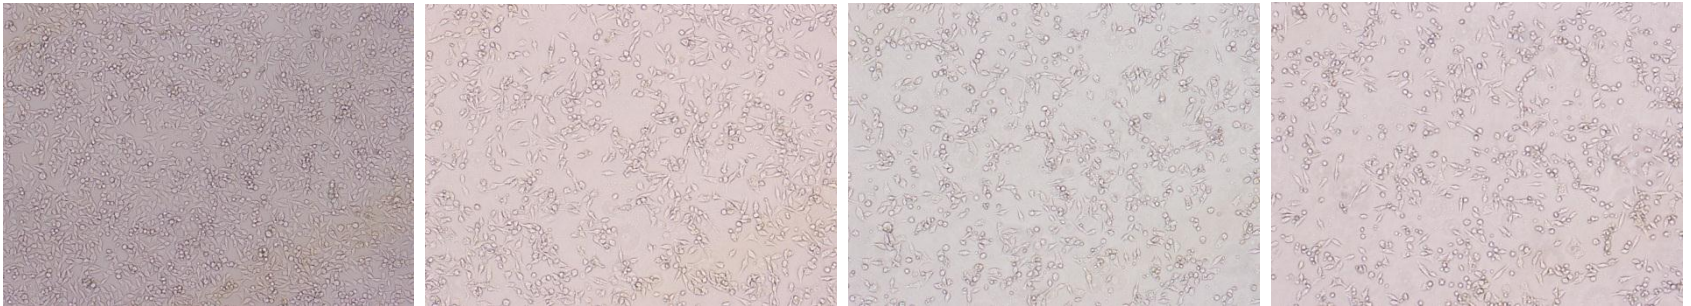**B****HCT116**

Control

5-Fu(20 $\mu\text{M}$ )Cur(20 $\mu\text{M}$ )+5-Fu(20 $\mu\text{M}$ )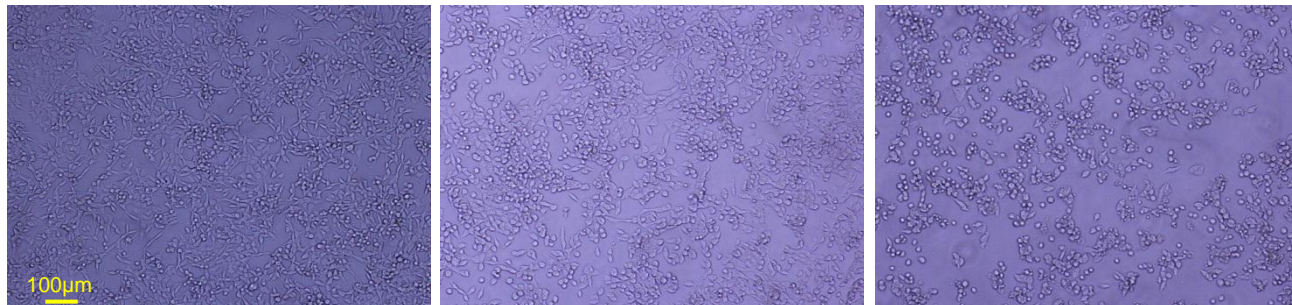

Supplement: 13046_2017_661_MOESM2_ESM.pdf [file 13046_2017_661_MOESM2_ESM.pdf]

HCT116

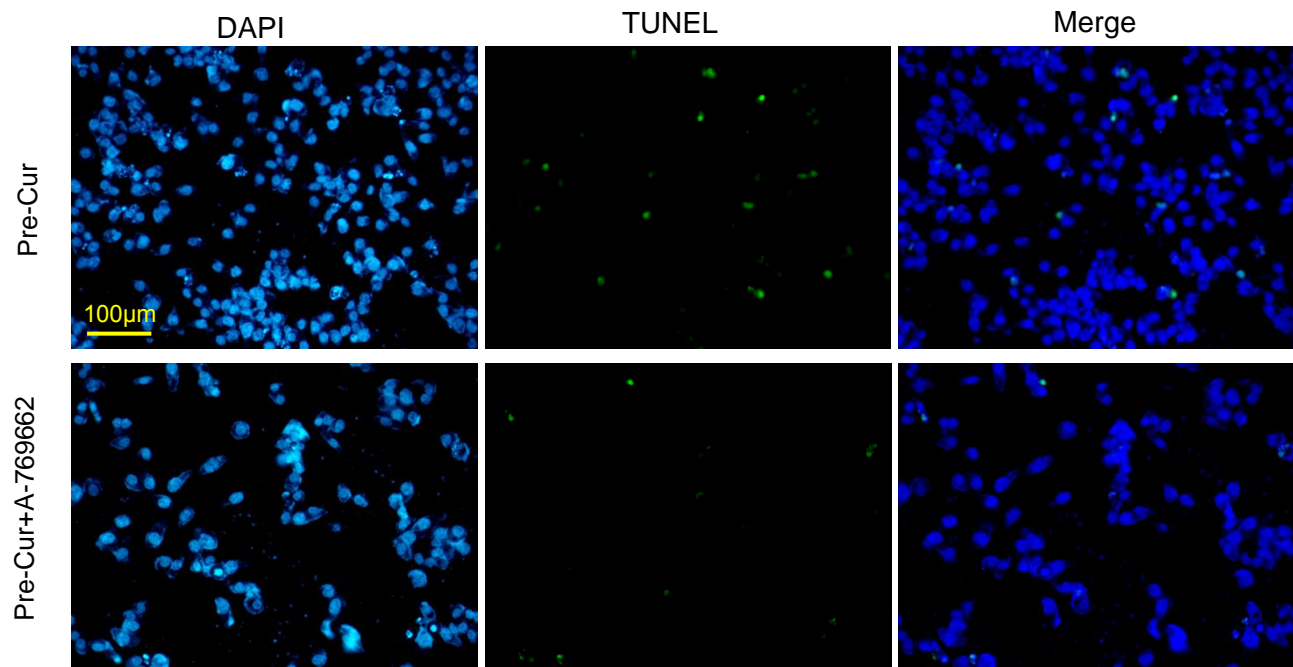

Supplement: 13046_2017_661_MOESM5_ESM.pdf [file 13046_2017_661_MOESM5_ESM.pdf]

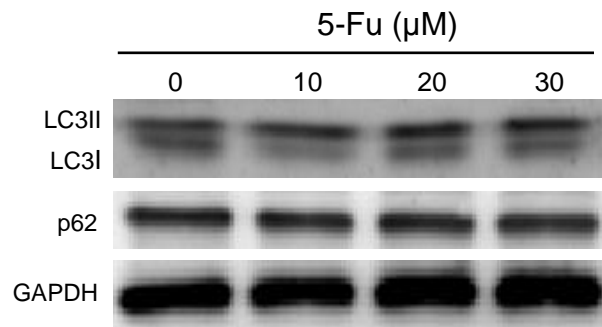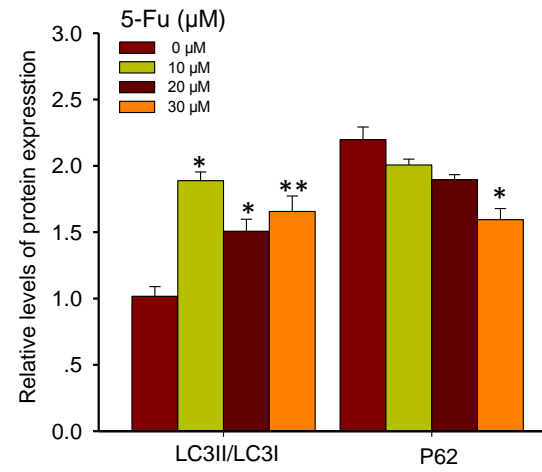

Supplement: MOESM3 [file 15329106]

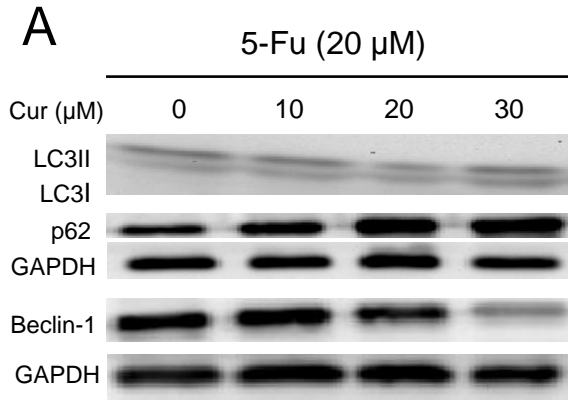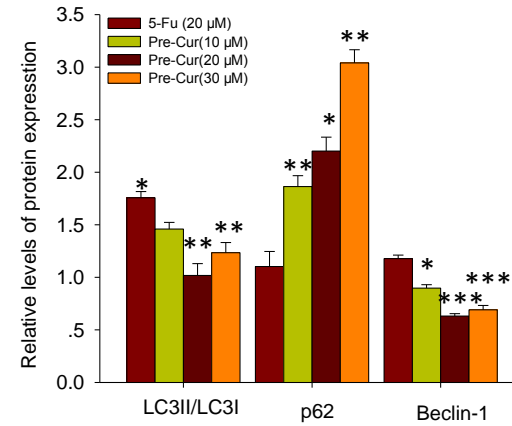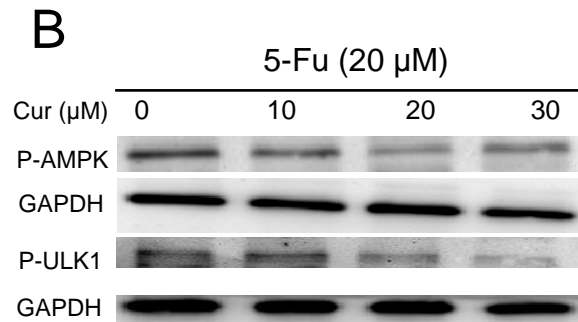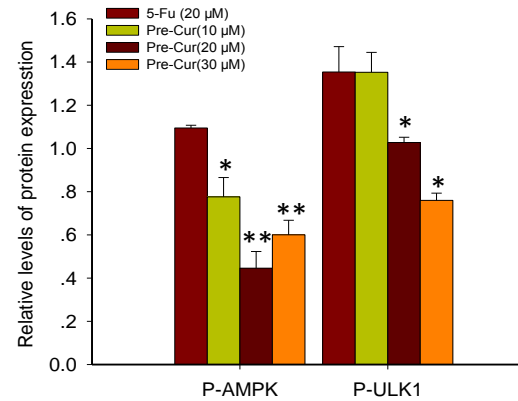

Supplement: MOESM4 [file 15329106]
